# Supplementary material for: SLY regulates genes involved in chromatin remodeling and interacts with TBL1XR1 during sperm differentiation
Source: PubMed Central journal article supplement — Cell Death Differ. 2017 May 5;24(6):1029–44. doi: 10.1038/cdd.2017.32 (PMC5442469; doi:10.1038/cdd.2017.32), 2017-05-05
Supplement: cdd201732x1.pdf [file cdd201732x1.pdf]

**Moretti et al.**

## **Supplementary Material**

### **Supplementary Figure 1. SLY ChIP-Seq extended panel.**

(A) Graphic representation of the percentage of SLY-enriched genomic regions (pink) and of the genome (blue) which are promoters (i.e. 1kb region upstream of TSS) calculated by Cis-regulatory Element Annotation System (CEAS). P-value for the significance of the relative enrichment with respect to the background was calculated using one-sided binomial test. (B) Graphic representation of the percentage of each chromosome found occupied by SLY protein by ChIP-Seq. (C) Results from ontology analyses of SLY ChIP-Seq genes using Genomatix.

### **Supplementary Figure 2. SLY co-localizes with active epigenetic marks.**

(A) Graphic representation of ChIP-Seq profile showing the average enrichment of SLY, H3K4me3, Kcr, H3K27me3 and H3K9me3 around the TSS of genes expressed (in red) and not expressed (in black) in round spermatids. (B) Percentage of genes with SLY present at their TSS (TSS +/- 500bp) among all mouse genes (mm10 version, in black) or among different categories of genes which are deregulated in Sly-KD spermatids (green or red). For genes significantly deregulated more than 1.5 fold, a higher proportion of upregulated genes (most of them XY-encoded genes) *versus* downregulated genes was found ( $\chi^2$ ,  $p=0.005$ ). When including all 1,171 significantly deregulated genes (no threshold,  $p<0.05$ ), there were more downregulated than upregulated genes ( $\chi^2$ ,  $p=0.012$ ). All downregulated genes are autosomal genes. See also Table 2.

### **Supplementary Figure 3. List of the genes with highest SLY peaks (Top 10%).**

### **Supplementary Figure 4. DOT1L protein pattern of expression in WT and Sly-KD testicular sections.**

Representative immunodetection images obtained using antibody against DOT1L protein on testicular sections from wild-type (WT) and Sly-knockdown (Sly-KD) mice, at stage XII (stage

where DOT1L co-localizes with the sex body in spermatocytes), stage IV (where DOT1L is detected in round spermatids) and stage X (where DOT1L is detected in elongating spermatids). The black and white images represent DAPI staining of the nuclei. DOT1L was detected in green. Lectin (red) was used to stain acrosomes in order to determine tubule stage. No detectable changes in pattern of expression was observed in Sly-KD versus WT spermatids, but the intensity of DOT1L signal over background in elongating spermatids is lower in Sly-KD compared to WT sections (see also Supplementary Figure 5). The inset in the upper-right corner represents a 2-fold magnification of the region in the white square. 'CS' stands for condensing spermatids, 'SC' for spermatocytes, 'RS' for round spermatids and 'ES' for elongating spermatids. Scale bar indicates 20 $\mu$ m.

#### **Supplementary Figure 5. DOT1L quantification by immunofluorescence.**

Schematics showing immunofluorescence quantification of DOT1L signal in Sly-KD and WT elongating spermatids (A) and in Sly-KD and WT spermatocytes at stage XII (B). The graphs represent the mean level +/- standard error of means. The star indicates significant different between the two genotypes by t-test ( $p < 0.01$ ).

#### **Supplementary Figure 6. H3K79me2 pattern of expression in WT and Sly-KD testicular sections.**

Representative immunodetection images obtained using antibody against H3K79me2 on testicular sections from wild-type (WT) and Sly-knockdown (Sly-KD) mice, at stage XI and XII (where H3K79me2 is detected in elongating spermatids) and at stage IV (where H3K79me2 signal is detected in round spermatids). The black and white images represent DAPI staining of the nuclei. H3K79me2 was detected in green. Lectin (red) was used to stain acrosomes in order to determine tubule stage. Pictures were taken using the same image capture parameters. No detectable changes in term of timing of expression was observed in Sly-KD versus WT spermatids, however the intensity of H3K79me2 signal over background in elongating spermatids (stage XII

and stage XI pictures) is markedly reduced in Sly-KD versus WT sections, as measured in Figure 4. Scale bar indicates 20 $\mu$ m.

#### **Supplementary Figure 7. H3K79me2 quantification by western blot.**

(A) Western blot detection of H3K79me2 in protein extracts from WT and Sly-KD (KD) elongating/condensing (ES/CS) spermatids. Antibody against TUBULIN was used to normalize the signal. Since the variability among samples from the same genotype was elevated we show here all the results we obtained in 3 independent experiments. (B) Western blot detection of H3K79me2 in protein extracts from WT and Sly-KD spermatozoa. A higher proportion of histones (notably of histone H3) is retained in Sly-KD spermatozoa compared to WT spermatozoa (see Figure 6), therefore, we also detected the same protein extracts with anti-Pan-H3 antibody. For both detection (H3K79me2 and Pan-H3), antibody against TUBULIN was used to normalize the signal. (C and D) Schematics showing western blot quantification of H3K79me2 (normalized to TUBULIN level) in Sly-KD and WT elongating/condensing spermatids (C) and in Sly-KD and WT spermatozoa (D). For spermatozoa, normalized H3K79me2 level was reported to that of normalized histone H3 level (detected with Pan-H3 antibody). On the scatter plots is represented the mean level +/- standard error of means. The star indicates significant different between the two genotypes by t-test [n = 7-8 samples per genotype, p=0.01 for (C); n= 4-5 samples per genotype, p=0.03 for (D)].

#### **Supplementary Figure 8. H3K79me2 detection in spermatozoa.**

Immunofluorescence detection of H3K79me2 (red) in WT epididymal spermatozoa. Hoechst (blue) was used to stain nuclei.

#### **Supplementary Figure 9. Ach4 pattern of expression in WT and Sly-KD testicular sections.**

Representative immunodetection images obtained using antibody against Ach4 on testicular sections from wild-type (WT) and Sly-knockdown (Sly-KD) mice, from stage X to XII. The black

and white images represent DAPI staining of the nuclei. Ach4 was detected in green. Lectin (red) was used to stain acrosomes in order to determine tubule stage. Pictures were taken using the same image capture parameters. No detectable changes in pattern of expression was observed in Sly-KD versus WT spermatids, however the intensity of Ach4 signal over background in elongating spermatids (stage X to stage XII) is markedly reduced in Sly-KD versus WT sections, as measured in Figure 5. Scale bar indicates 20 $\mu$ m.

### **Supplementary Figure 10. Characterization of FLAG-SLY transgenic mice.**

(A) Transcript level of *Sly1* isoform and of *Sly* all isoforms (*Sly* global) measured by RT-qPCR in wild-type (WT) and FLAG-SLY transgenic whole testes. The graph represents the mean  $\pm$  standard error of means (after normalization with *Acrv1*, n=4 samples per genotype). A significant difference between FLAG-SLY and WT samples was found by t-tests with both types of primers (p-value<0.0005). (B) Western blot detection of SLY protein in cytosolic and nuclear fractions of adult FLAG-SLY and WT testes, using anti-FLAG, anti-SLY and anti-SLX/SLXL1 antibodies. Anti-FLAG only detects FLAG-SLY recombinant protein. Anti-SLY detects endogenous SLY and FLAG-SLY recombinant protein. Anti-SLX/SLXL1 was used to control the purity of the nuclear fraction. Arrows indicate the specific band (at expected sizes of  $\sim$ 38kDa for SLY/FLAG-SLY, and  $\sim$ 34kDa for SLX/SLXL1) and stars, non-specific bands. Ponceau staining was used to control the quantity of protein loaded in each lane. (C) Immunodetection using antibody against FLAG on stage VII testicular sections from FLAG-SLY and WT mice. FLAG was detected in green. DAPI (in blue) was used to stain the nuclei. Lectin (red) was used to stain acrosomes in order to determine tubule stage. RS indicates 'round spermatids', SC indicates 'spermatocytes'. In the upper panel, the scale bar indicates 20 $\mu$ m. The bottom panel represents a 2x magnification of the insets. Pictures were taken using the same image capture parameters. The recombinant FLAG-SLY protein is only detected in FLAG-SLY transgenic round spermatids.

**Supplementary Figure 11.** List of the primers designed for the present study.

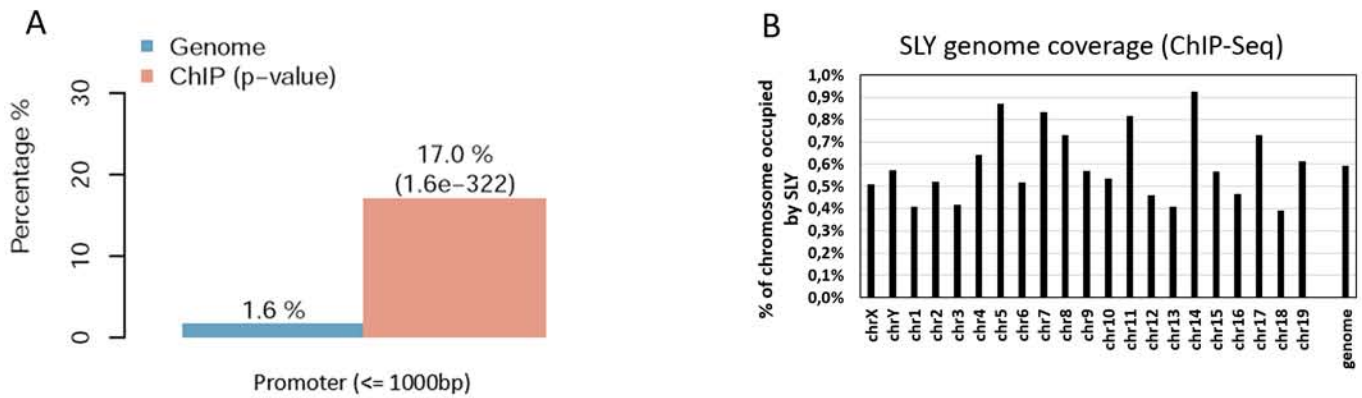

C

## Genomatix ontology analysis of SLY ChIP-Seq genes

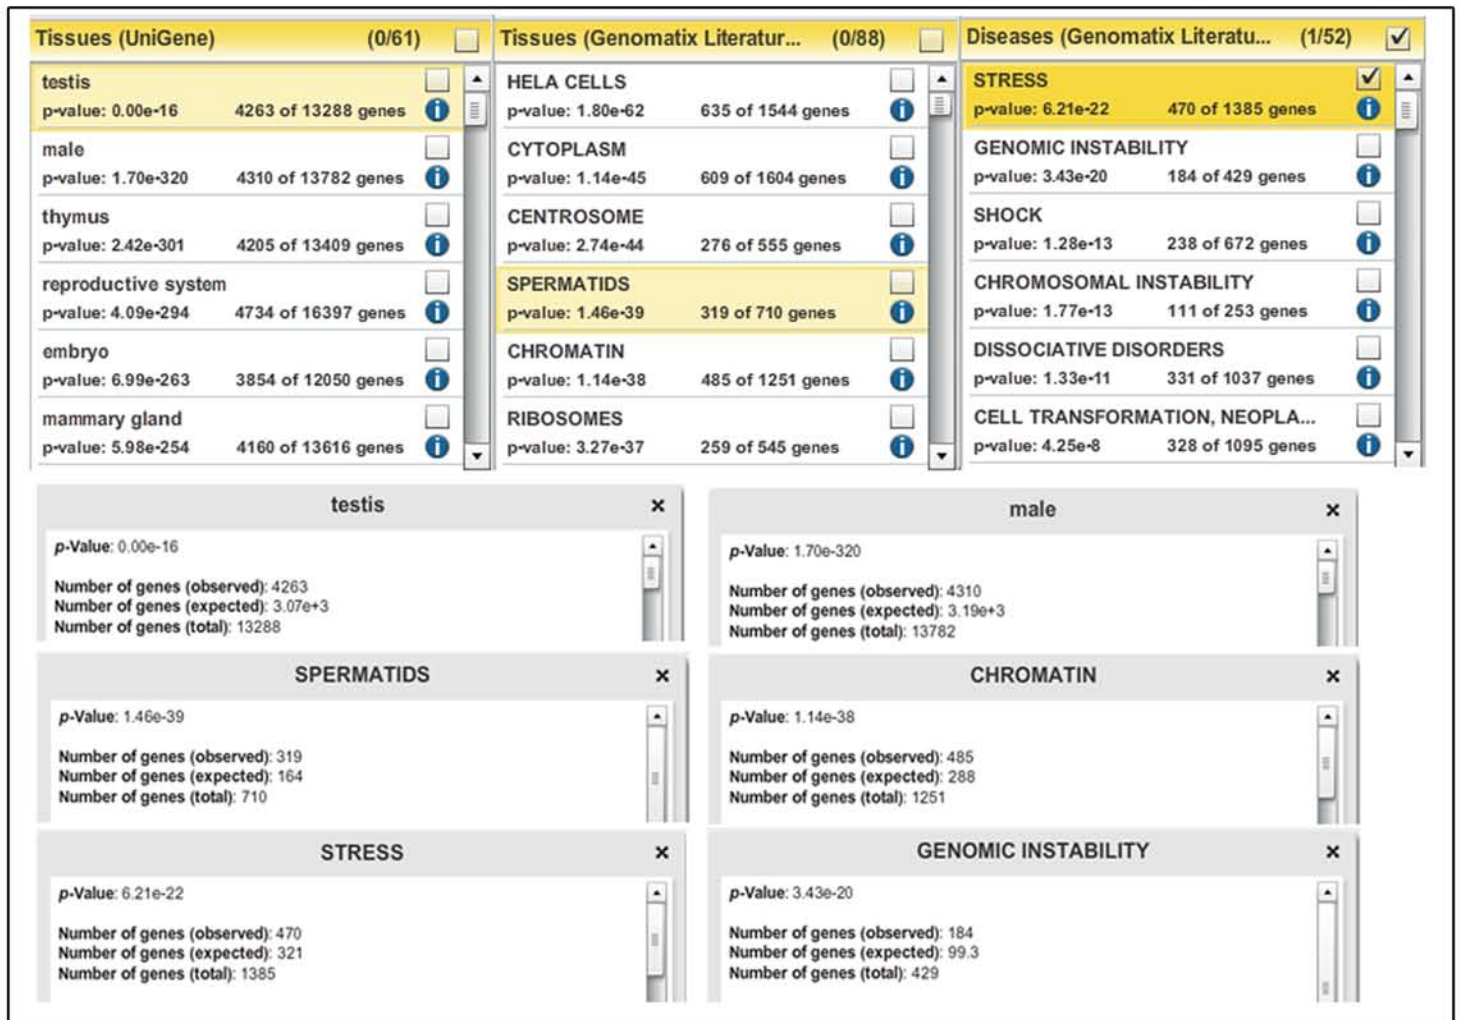

A

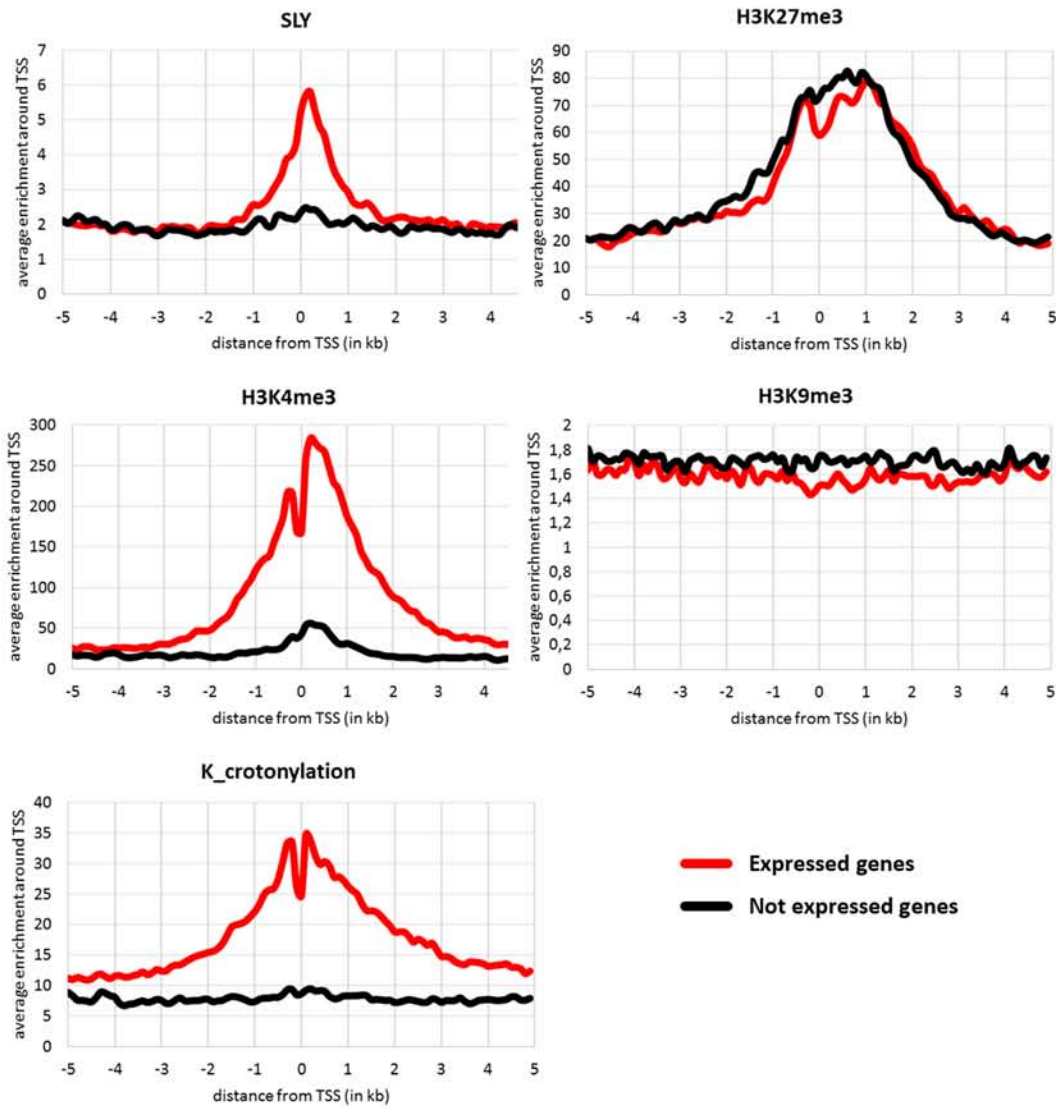

B

Percentage of genes with SLY at their TSS

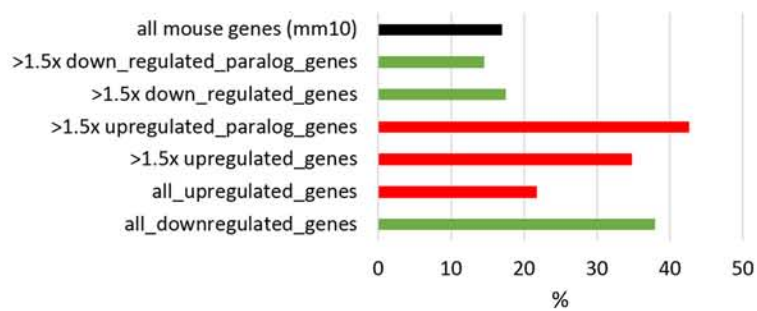

Fig S3. Moretti et al.

| chromosome location | gene name     |
|---------------------|---------------|
| chr1                | 4930594C11Rik |
| chr1                | Abl2          |
| chr1                | Actr3         |
| chr1                | Boll          |
| chr1                | Desi2         |
| chr1                | Dis3l2        |
| chr1                | Dnah14        |
| chr1                | Efcab2        |
| chr1                | Fbxo28        |
| chr1                | Fbxo36        |
| chr1                | Fcgr3         |
| chr1                | Gm16067       |
| chr1                | Gm16094       |
| chr1                | Gm25911       |
| chr1                | Gpatch2       |
| chr1                | H3f3a         |
| chr1                | Hjurp         |
| chr1                | Inpp4a        |
| chr1                | Kdm5b         |
| chr1                | Lmbrd1        |
| chr1                | mmu-mir-6546  |
| chr1                | Pask          |
| chr1                | Ppp1r7        |
| chr1                | Prrc2c        |
| chr1                | Rc3h1         |
| chr1                | Sp110         |
| chr1                | Sp140         |
| chr1                | Spata17       |
| chr1                | Stk17b        |
| chr1                | Suco          |
| chr1                | Tor1aip1      |
| chr1                | Tor1aip2      |
| chr1                | Trip12        |
| chr1                | Trpm8         |
| chr1                | Zfp451        |
| chr2                | 1700003F12Rik |
| chr2                | 2900097C17Rik |
| chr2                | Adnp          |
| chr2                | Cse1l         |
| chr2                | Ddx31         |
| chr2                | Gabpb1        |
| chr2                | Gm10800       |
| chr2                | Gm10801       |
| chr2                | Gm11458       |
| chr2                | Gm13345       |
| chr2                | Gm13483       |
| chr2                | Gm13532       |
| chr2                | Gm23969       |

| chromosome location | gene name     |
|---------------------|---------------|
| chr10               | Ctdsp2        |
| chr10               | Ddx50         |
| chr10               | Dot1l         |
| chr10               | Dtx3          |
| chr10               | Eef2          |
| chr10               | F420014N23Rik |
| chr10               | Fzr1          |
| chr10               | Gm8540        |
| chr10               | Gucd1         |
| chr10               | Jmjd1c        |
| chr10               | Lats1         |
| chr10               | Mex3d         |
| chr10               | Pcmt1         |
| chr10               | Pcnt          |
| chr10               | Pttg1ip       |
| chr10               | Rrp1          |
| chr10               | Snord37       |
| chr10               | Snrpd3        |
| chr10               | Snrpf         |
| chr10               | Speer5-ps1    |
| chr10               | Stk11         |
| chr10               | Uhrf1bp1l     |
| chr11               | 1700016P03Rik |
| chr11               | 1700024J04Rik |
| chr11               | 1700064E03Rik |
| chr11               | 1700106J16Rik |
| chr11               | Arhgap23      |
| chr11               | Cdk12         |
| chr11               | Cep95         |
| chr11               | Cltc          |
| chr11               | Csnk1d        |
| chr11               | Cyb5d1        |
| chr11               | Ddx5          |
| chr11               | Efcab5        |
| chr11               | Eif4a1        |
| chr11               | Epn2          |
| chr11               | Gas2l1        |
| chr11               | Gga3          |
| chr11               | Ggnbp2        |
| chr11               | Gm11423       |
| chr11               | Gm12061       |
| chr11               | Gm12204       |
| chr11               | Gm12206       |
| chr11               | Gm12209       |
| chr11               | Gm12279       |
| chr11               | Gsg2          |
| chr11               | Hexim2        |
| chr11               | Jmjd6         |

|      |               |       |               |
|------|---------------|-------|---------------|
| chr2 | Gm27003       | chr11 | Kansl1        |
| chr2 | GNAS-AS1_4    | chr11 | Kpna2         |
| chr2 | GNAS-AS1_5    | chr11 | Lig3          |
| chr2 | Gtf3c4        | chr11 | Lsmd1         |
| chr2 | Med22         | chr11 | Med13         |
| chr2 | Mllt10        | chr11 | Mettl23       |
| chr2 | Mmadhc        | chr11 | Mir132        |
| chr2 | Naif1         | chr11 | Mir212        |
| chr2 | Nespos        | chr11 | Mnt           |
| chr2 | Ntmt1         | chr11 | Morc2a        |
| chr2 | Odf2          | chr11 | Mrps7         |
| chr2 | Ppp4r1l-ps    | chr11 | Msl1          |
| chr2 | Qsox2         | chr11 | Nploc4        |
| chr2 | Rab22a        | chr11 | Papolg        |
| chr2 | Rpl7a         | chr11 | Phf23         |
| chr2 | Slc25a25      | chr11 | Poldip2       |
| chr2 | Spo11         | chr11 | Ppp1r9b       |
| chr2 | Ttc30a1       | chr11 | Rptor         |
| chr2 | Ttc30b        | chr11 | Slc43a2       |
| chr2 | Zbtb34        | chr11 | Tekt3         |
| chr2 | Zfp335        | chr11 | Tlk2          |
| chr3 | 1700125G22Rik | chr11 | Tmem199       |
| chr3 | 4930539J05Rik | chr11 | Tmem88        |
| chr3 | 4930577N17Rik | chr11 | Tug1          |
| chr3 | 4933429H19Rik | chr11 | TUG1_1        |
| chr3 | Adad1         | chr11 | Ubb           |
| chr3 | Arnt          | chr11 | Ube2b         |
| chr3 | Atxn7l2       | chr11 | Ubt2d2        |
| chr3 | Chtop         | chr11 | Ulk2          |
| chr3 | Ect2          | chr11 | Usp34         |
| chr3 | Elf2          | chr11 | Ybx2          |
| chr3 | Gar1          | chr12 | 4930555J06Rik |
| chr3 | Gm17402       | chr12 | Angel1        |
| chr3 | Gm20632       | chr12 | Arl4a         |
| chr3 | Hist2h2aa2    | chr12 | Cpsf2         |
| chr3 | Hist2h3c2     | chr12 | Crip2         |
| chr3 | Hspa4l        | chr12 | D130020L05Rik |
| chr3 | Mfn1          | chr12 | Dcaf5         |
| chr3 | Mlf1          | chr12 | Eif5          |
| chr3 | Mtx1          | chr12 | Hsp90aa1      |
| chr3 | Naa15         | chr12 | Otub2         |
| chr3 | Pgrmc2        | chr12 | Pnpla8        |
| chr3 | Polr3c        | chr12 | Rab10         |
| chr3 | Pygo2         | chr12 | Rtn1          |
| chr3 | Rnf115        | chr12 | Smek1         |
| chr3 | Rsb1          | chr12 | Tmed10        |
| chr3 | Sec62         | chr12 | Wdr20a        |
| chr3 | Thbs3         | chr12 | Yy1           |
| chr3 | Ube2d3        | chr12 | Zc3h14        |
| chr4 | 1700095A21Rik | chr13 | Arid4b        |



|      |               |       |                |
|------|---------------|-------|----------------|
| chr4 | 2610301B20Rik | chr13 | BC005537       |
| chr4 | 4933438K21Rik | chr13 | Btf3           |
| chr4 | Akirin2       | chr13 | Fars2          |
| chr4 | D4Wsu53e      | chr13 | Ggps1          |
| chr4 | Fam229a       | chr13 | Gm24187        |
| chr4 | Fam76a        | chr13 | Gm9828         |
| chr4 | Gm10580       | chr13 | Hnrnpk         |
| chr4 | Gm12905       | chr13 | Lyrn4          |
| chr4 | Gm13034       | chr13 | Nup153         |
| chr4 | Gm13135       | chr13 | Rmi1           |
| chr4 | Gm13136       | chr13 | Rnf44          |
| chr4 | Gm13140       | chr13 | Ssr1           |
| chr4 | Gm13165       | chr14 | 1700001F09Rik  |
| chr4 | Gm13169       | chr14 | 1700049E17Rik1 |
| chr4 | Gm13231       | chr14 | 1700049E17Rik2 |
| chr4 | Gm13236       | chr14 | 1700091H14Rik  |
| chr4 | Gm13238       | chr14 | 3110083C13Rik  |
| chr4 | Gm13241       | chr14 | 4930444M15Rik  |
| chr4 | Gm13275       | chr14 | 4931440J10Rik  |
| chr4 | Gm13278       | chr14 | BC061237       |
| chr4 | Gm13285       | chr14 | D14Abb1e       |
| chr4 | Gm13287       | chr14 | Dhd1           |
| chr4 | Gm13288       | chr14 | Fgf9           |
| chr4 | Gm13289       | chr14 | Gm10128        |
| chr4 | Gm13290       | chr14 | Gm10340        |
| chr4 | Gm21953       | chr14 | Gm10375        |
| chr4 | Gm21980       | chr14 | Gm10376        |
| chr4 | Gm26525       | chr14 | Gm10377        |
| chr4 | Gm26606       | chr14 | Gm15918        |
| chr4 | Gm26763       | chr14 | Gm16241        |
| chr4 | Gm26867       | chr14 | Gm16506        |
| chr4 | Lrrc41        | chr14 | Gm17026        |
| chr4 | Mycbp         | chr14 | Gm17027        |
| chr4 | Pigv          | chr14 | Gm17078        |
| chr4 | Rbm12b1       | chr14 | Gm17079        |
| chr4 | Rbm12b2       | chr14 | Gm17093        |
| chr4 | Sfpq          | chr14 | Gm17124        |
| chr4 | Smarca5-ps    | chr14 | Gm17174        |
| chr4 | Spata6        | chr14 | Gm17175        |
| chr4 | Tmem222       | chr14 | Gm17654        |
| chr4 | Tmem67        | chr14 | Gm21560        |
| chr4 | Tssk3         | chr14 | Gm21738        |
| chr4 | Ube2j2        | chr14 | Gm21754        |
| chr4 | Uqcrh         | chr14 | Gm21977        |
| chr4 | Vcp           | chr14 | Gm2237         |
| chr4 | Zcchc11       | chr14 | Gm2832         |
| chr4 | Zfp37         | chr14 | Gm2930         |
| chr5 | 4930449I24Rik | chr14 | Gm2951         |
| chr5 | 4930572O03Rik | chr14 | Gm2974         |
| chr5 | 5031410I06Rik | chr14 | Gm3002         |

|      |             |       |        |
|------|-------------|-------|--------|
| chr5 | Abcf2       | chr14 | Gm3012 |
| chr5 | Adap1       | chr14 | Gm3015 |
| chr5 | Atxn2       | chr14 | Gm3072 |
| chr5 | D5Erttd579e | chr14 | Gm3095 |
| chr5 | Dynll1      | chr14 | Gm3115 |
| chr5 | Erp29       | chr14 | Gm3141 |
| chr5 | Gm10220     | chr14 | Gm3173 |
| chr5 | Gm10354     | chr14 | Gm3239 |
| chr5 | Gm10382     | chr14 | Gm3264 |
| chr5 | Gm10471     | chr14 | Gm3298 |
| chr5 | Gm13830     | chr14 | Gm3317 |
| chr5 | Gm17019     | chr14 | Gm3327 |
| chr5 | Gm1979      | chr14 | Gm3373 |
| chr5 | Gm21655     | chr14 | Gm3411 |
| chr5 | Gm21671     | chr14 | Gm3453 |
| chr5 | Gm21698     | chr14 | Gm3468 |
| chr5 | Gm23866     | chr14 | Gm3486 |
| chr5 | Gm3402      | chr14 | Gm3500 |
| chr5 | Gm3409      | chr14 | Gm3543 |
| chr5 | Gm3415      | chr14 | Gm3573 |
| chr5 | Gm3495      | chr14 | Gm3591 |
| chr5 | Gm5862      | chr14 | Gm3629 |
| chr5 | Gm6272      | chr14 | Gm3633 |
| chr5 | Gm6370      | chr14 | Gm3636 |
| chr5 | Gm7347      | chr14 | Gm3676 |
| chr5 | Gm7361      | chr14 | Gm3696 |
| chr5 | Gm9758      | chr14 | Gm4181 |
| chr5 | Gtf2ird2    | chr14 | Gm5798 |
| chr5 | Iscu        | chr14 | Gm5799 |
| chr5 | Kctd10      | chr14 | Gm5929 |
| chr5 | Mlec        | chr14 | Gm6337 |
| chr5 | Nudt9       | chr14 | Gm6356 |
| chr5 | Nupr1l      | chr14 | Gm6401 |
| chr5 | Rab28       | chr14 | Gm6482 |
| chr5 | Radil       | chr14 | Gm7233 |
| chr5 | Sart3       | chr14 | Gm7929 |
| chr5 | Sfswap      | chr14 | Gm7945 |
| chr5 | Sgcb        | chr14 | Gm7951 |
| chr5 | Smim14      | chr14 | Gm7954 |
| chr5 | Spata18     | chr14 | Gm7970 |
| chr5 | Speer4a     | chr14 | Gm7980 |
| chr5 | Speer4b     | chr14 | Gm8005 |
| chr5 | Speer4c     | chr14 | Gm8011 |
| chr5 | Speer4d     | chr14 | Gm8020 |
| chr5 | Speer4e     | chr14 | Gm8024 |
| chr5 | Speer4f     | chr14 | Gm8032 |
| chr5 | Tmem116     | chr14 | Gm8068 |
| chr5 | Ubc         | chr14 | Gm8082 |
| chr5 | Ube2k       | chr14 | Gm8094 |
| chr5 | Ube3b       | chr14 | Gm8104 |

|      |               |       |               |
|------|---------------|-------|---------------|
| chr5 | Wbscr27       | chr14 | Gm8108        |
| chr5 | Ythdc1        | chr14 | Gm8122        |
| chr5 | Zcchc8        | chr14 | Gm8126        |
| chr6 | 1600020E01Rik | chr14 | Gm8127        |
| chr6 | 1700095J07Rik | chr14 | Gm8138        |
| chr6 | 4933440N22Rik | chr14 | Gm8165        |
| chr6 | BC049715      | chr14 | Gm8180        |
| chr6 | Ccdc91        | chr14 | Gm8212        |
| chr6 | Chd4          | chr14 | Gm8220        |
| chr6 | Cntnap2       | chr14 | Gm8229        |
| chr6 | Gm24975       | chr14 | Gm8232        |
| chr6 | Gm6288        | chr14 | Gm8247        |
| chr6 | Gm7292        | chr14 | Gm8256        |
| chr6 | Hnrnpf        | chr14 | Gm8281        |
| chr6 | mmu-mir-7045  | chr14 | Gm9611        |
| chr6 | Pcbp1         | chr14 | Ints6         |
| chr6 | Tra2a         | chr14 | Micu2         |
| chr6 | Ube2h         | chr14 | Mir5131       |
| chr6 | Wbp11         | chr14 | Mphosph8      |
| chr7 | 1700081H22Rik | chr14 | Mtmr6         |
| chr7 | Aamdc         | chr14 | Nr1d2         |
| chr7 | Akt2          | chr14 | Ppp2r2a       |
| chr7 | Aspdh         | chr14 | Pxk           |
| chr7 | Atf5          | chr14 | Tmem254a      |
| chr7 | Atxn2l        | chr14 | Tmem254b      |
| chr7 | Bcam          | chr14 | Tmem254c      |
| chr7 | Catsperg1     | chr14 | Tsc22d1       |
| chr7 | Cdipt         | chr14 | Xkr6          |
| chr7 | Clpb          | chr14 | Zmym2         |
| chr7 | D430042O09Rik | chr15 | 1810049J17Rik |
| chr7 | D830044I16Rik | chr15 | 2410089E03Rik |
| chr7 | Dyrk1b        | chr15 | Azin1         |
| chr7 | E130304I02Rik | chr15 | Ep300         |
| chr7 | Erc1          | chr15 | Gm23880       |
| chr7 | Erf           | chr15 | Gm26884       |
| chr7 | Fus           | chr15 | Golph3        |
| chr7 | Galp          | chr15 | Gtpbp1        |
| chr7 | Gm5591        | chr15 | Lmbr1l        |
| chr7 | Gm6605        | chr15 | Muc19         |
| chr7 | Grik5         | chr15 | Nhp2l1        |
| chr7 | Gtf3c1        | chr15 | Nup50         |
| chr7 | Il4i1         | chr15 | Rad21         |
| chr7 | Josd2         | chr15 | Rgs22         |
| chr7 | Klc3          | chr15 | Ywhaz         |
| chr7 | Mapk1ip1      | chr15 | Zfr           |
| chr7 | Med25         | chr16 | Eaf2          |
| chr7 | mmu-mir-7052  | chr16 | Gm23935       |
| chr7 | Nup62         | chr16 | Golgb1        |
| chr7 | Pcf11         | chr16 | Golgb1        |
| chr7 | Pex11a        | chr16 | Lca5l         |

|      |               |       |               |
|------|---------------|-------|---------------|
| chr7 | Pnmal2        | chr16 | Mpv17l        |
| chr7 | Ppp1r37       | chr16 | Pdxdc1        |
| chr7 | Ppp2r2d       | chr16 | Ppp1r2        |
| chr7 | Rbbp6         | chr16 | Ptplb         |
| chr7 | Rsf1          | chr16 | Setd4         |
| chr7 | Ube2s         | chr16 | Ube2l3        |
| chr7 | Wdr93         | chr16 | Yeats2        |
| chr7 | Zc3h4         | chr17 | Aars2         |
| chr7 | Zfp446        | chr17 | Agpat1        |
| chr7 | Zfp507        | chr17 | Atl2          |
| chr7 | Zfp646        | chr17 | AY036118      |
| chr7 | Zfp668        | chr17 | Btbd9         |
| chr8 | 2610005L07Rik | chr17 | Dnah8         |
| chr8 | 4930467E23Rik | chr17 | Dynlt1c       |
| chr8 | Acs1          | chr17 | Fgfr1op       |
| chr8 | Agpat6        | chr17 | Flywch1       |
| chr8 | Amfr          | chr17 | Gm16275       |
| chr8 | Ap1g1         | chr17 | Gm17705       |
| chr8 | C330011M18Rik | chr17 | Gm20427       |
| chr8 | Cdkn2aip      | chr17 | Gm26917       |
| chr8 | Cnep1r1       | chr17 | Gm26924       |
| chr8 | Csnk2a2       | chr17 | Hsp90ab1      |
| chr8 | E030037K01Rik | chr17 | mmu-mir-6968  |
| chr8 | Evi5l         | chr17 | Nfya          |
| chr8 | Fam192a       | chr17 | Oard1         |
| chr8 | Gm15319       | chr17 | Phf1          |
| chr8 | Gm20946       | chr17 | Phf10         |
| chr8 | Gm21092       | chr17 | Ppp1r2-ps1    |
| chr8 | Gm21119       | chr17 | Prrc2a        |
| chr8 | Gm21769       | chr17 | Rnf5          |
| chr8 | Gm22291       | chr17 | RP24-271E12.4 |
| chr8 | Gm23284       | chr17 | Rxb           |
| chr8 | Gm23647       | chr17 | Slc39a7       |
| chr8 | Gm25212       | chr17 | Tagap1        |
| chr8 | Gm2716        | chr17 | Tbc1d22b      |
| chr8 | Gm9725        | chr17 | Tmem217       |
| chr8 | Gtl3          | chr17 | Trim39        |
| chr8 | n-R5s144      | chr17 | Ube2i         |
| chr8 | n-R5s146      | chr17 | Zfand3        |
| chr8 | n-R5s149      | chr18 | Atp9b         |
| chr8 | Rfx1          | chr18 | Fam53c        |
| chr8 | Rspry1        | chr18 | Ndfip1        |
| chr8 | Smarca5       | chr18 | Pqlc1         |
| chr8 | Tmem66        | chr18 | Rnf138        |
| chr8 | Usp38         | chr18 | Sil1          |
| chr8 | Znrf1         | chr19 | 4930505N22Rik |
| chr9 | 4930535L15Rik | chr19 | 9130011E15Rik |
| chr9 | Arcn1         | chr19 | AI846148      |
| chr9 | Dalrd3        | chr19 | Cfl1          |
| chr9 | Dennd4a       | chr19 | Cnih2         |

|       |               |
|-------|---------------|
| chr9  | Dnaja4        |
| chr9  | Elovl5        |
| chr9  | Fbxl12        |
| chr9  | Gm24083       |
| chr9  | Gm24270       |
| chr9  | Gtf2a2        |
| chr9  | Ift46         |
| chr9  | Ip6k1         |
| chr9  | Kif9          |
| chr9  | Klhl18        |
| chr9  | Map2k5        |
| chr9  | Map4          |
| chr9  | Mir425        |
| chr9  | mmu-mir-6236  |
| chr9  | Ndufaf3       |
| chr9  | Osbpl10       |
| chr9  | Pkm           |
| chr9  | Prdm10        |
| chr9  | Senp6         |
| chr9  | Sept7         |
| chr9  | Sltm          |
| chr9  | Ubl5          |
| chr10 | 2510003E04Rik |
| chr10 | 4933403O03Rik |
| chr10 | 4933406P04Rik |
| chr10 | 4933408J17Rik |
| chr10 | Ap3d1         |
| chr10 | Bclaf1        |
| chr10 | Btg1          |
| chr10 | Cirbp         |

|       |              |
|-------|--------------|
| chr19 | Dpf2         |
| chr19 | Frat2        |
| chr19 | Gm15491      |
| chr19 | Hnrnpul2     |
| chr19 | Kdm2a        |
| chr19 | Lrrc10b      |
| chr19 | Mgea5        |
| chr19 | mmu-mir-8092 |
| chr19 | Naa40        |
| chr19 | Npm3         |
| chr19 | Pcgf6        |
| chr19 | Ppp1r2-ps3   |
| chr19 | Ppp6r3       |
| chr19 | Stip1        |
| chr19 | Suv420h1     |
| chr19 | Ttc9c        |
| chr19 | Zfp518a      |
| chrX  | Alg13        |
| chrX  | Asmt         |
| chrX  | Gm14819      |
| chrX  | Gm21887      |
| chrX  | Gm2825       |
| chrX  | Gm5073       |
| chrX  | Gm5123       |
| chrX  | Gm5755       |
| chrX  | Supt20-ps    |
| chrY  | Erdr1        |
| chrY  | Gm21572      |
| chrY  | Gm21599      |
| chrY  | Gm21780      |

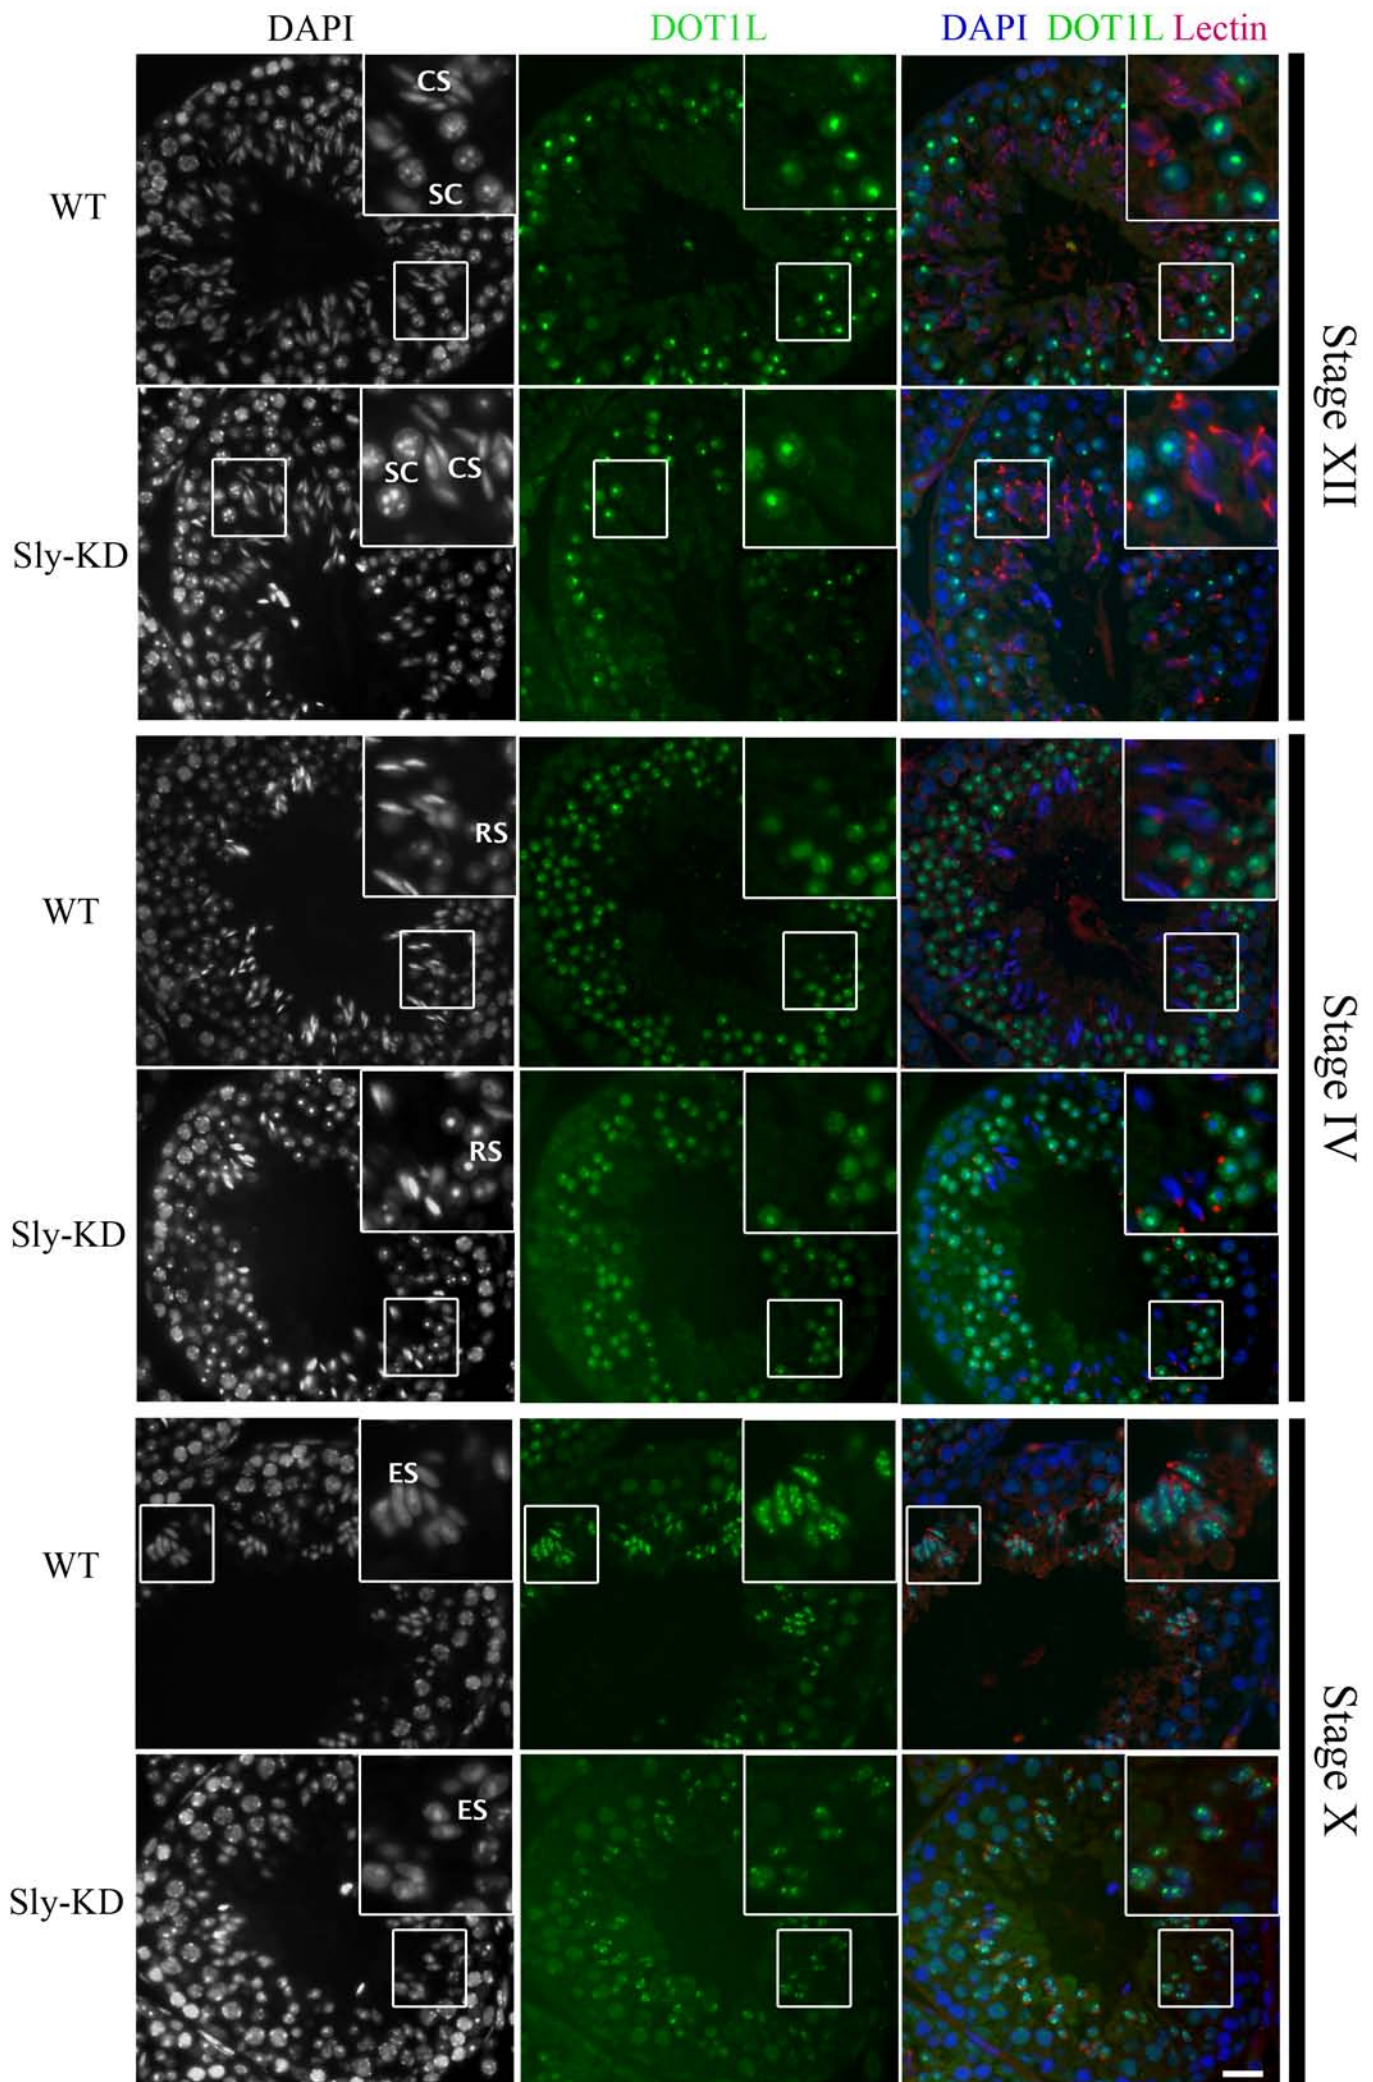

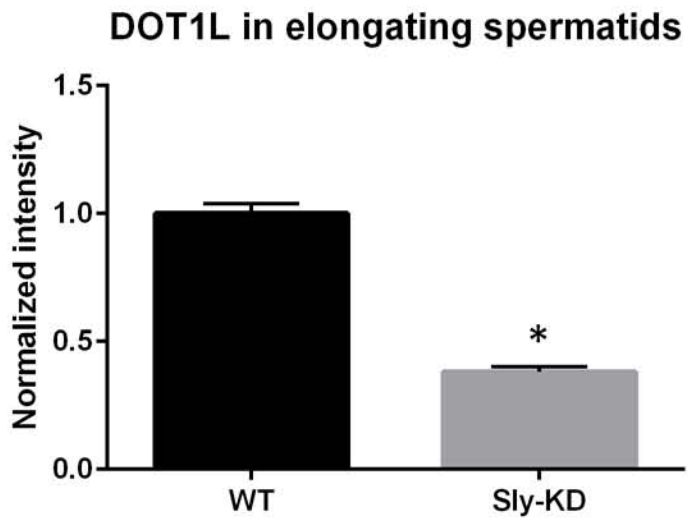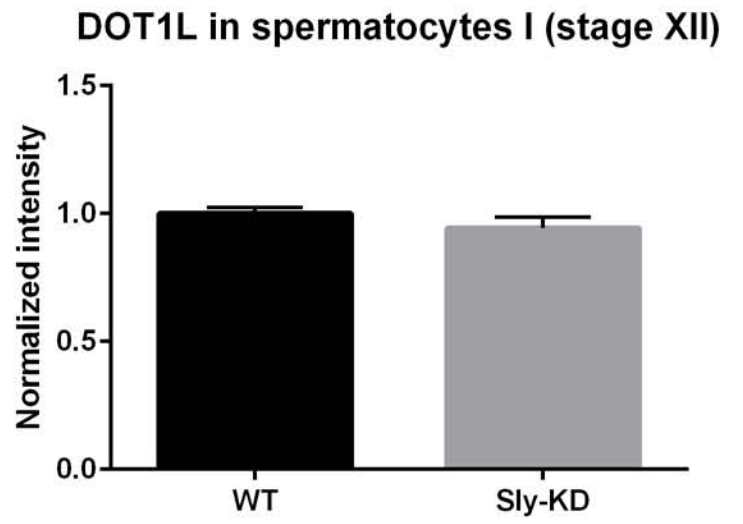

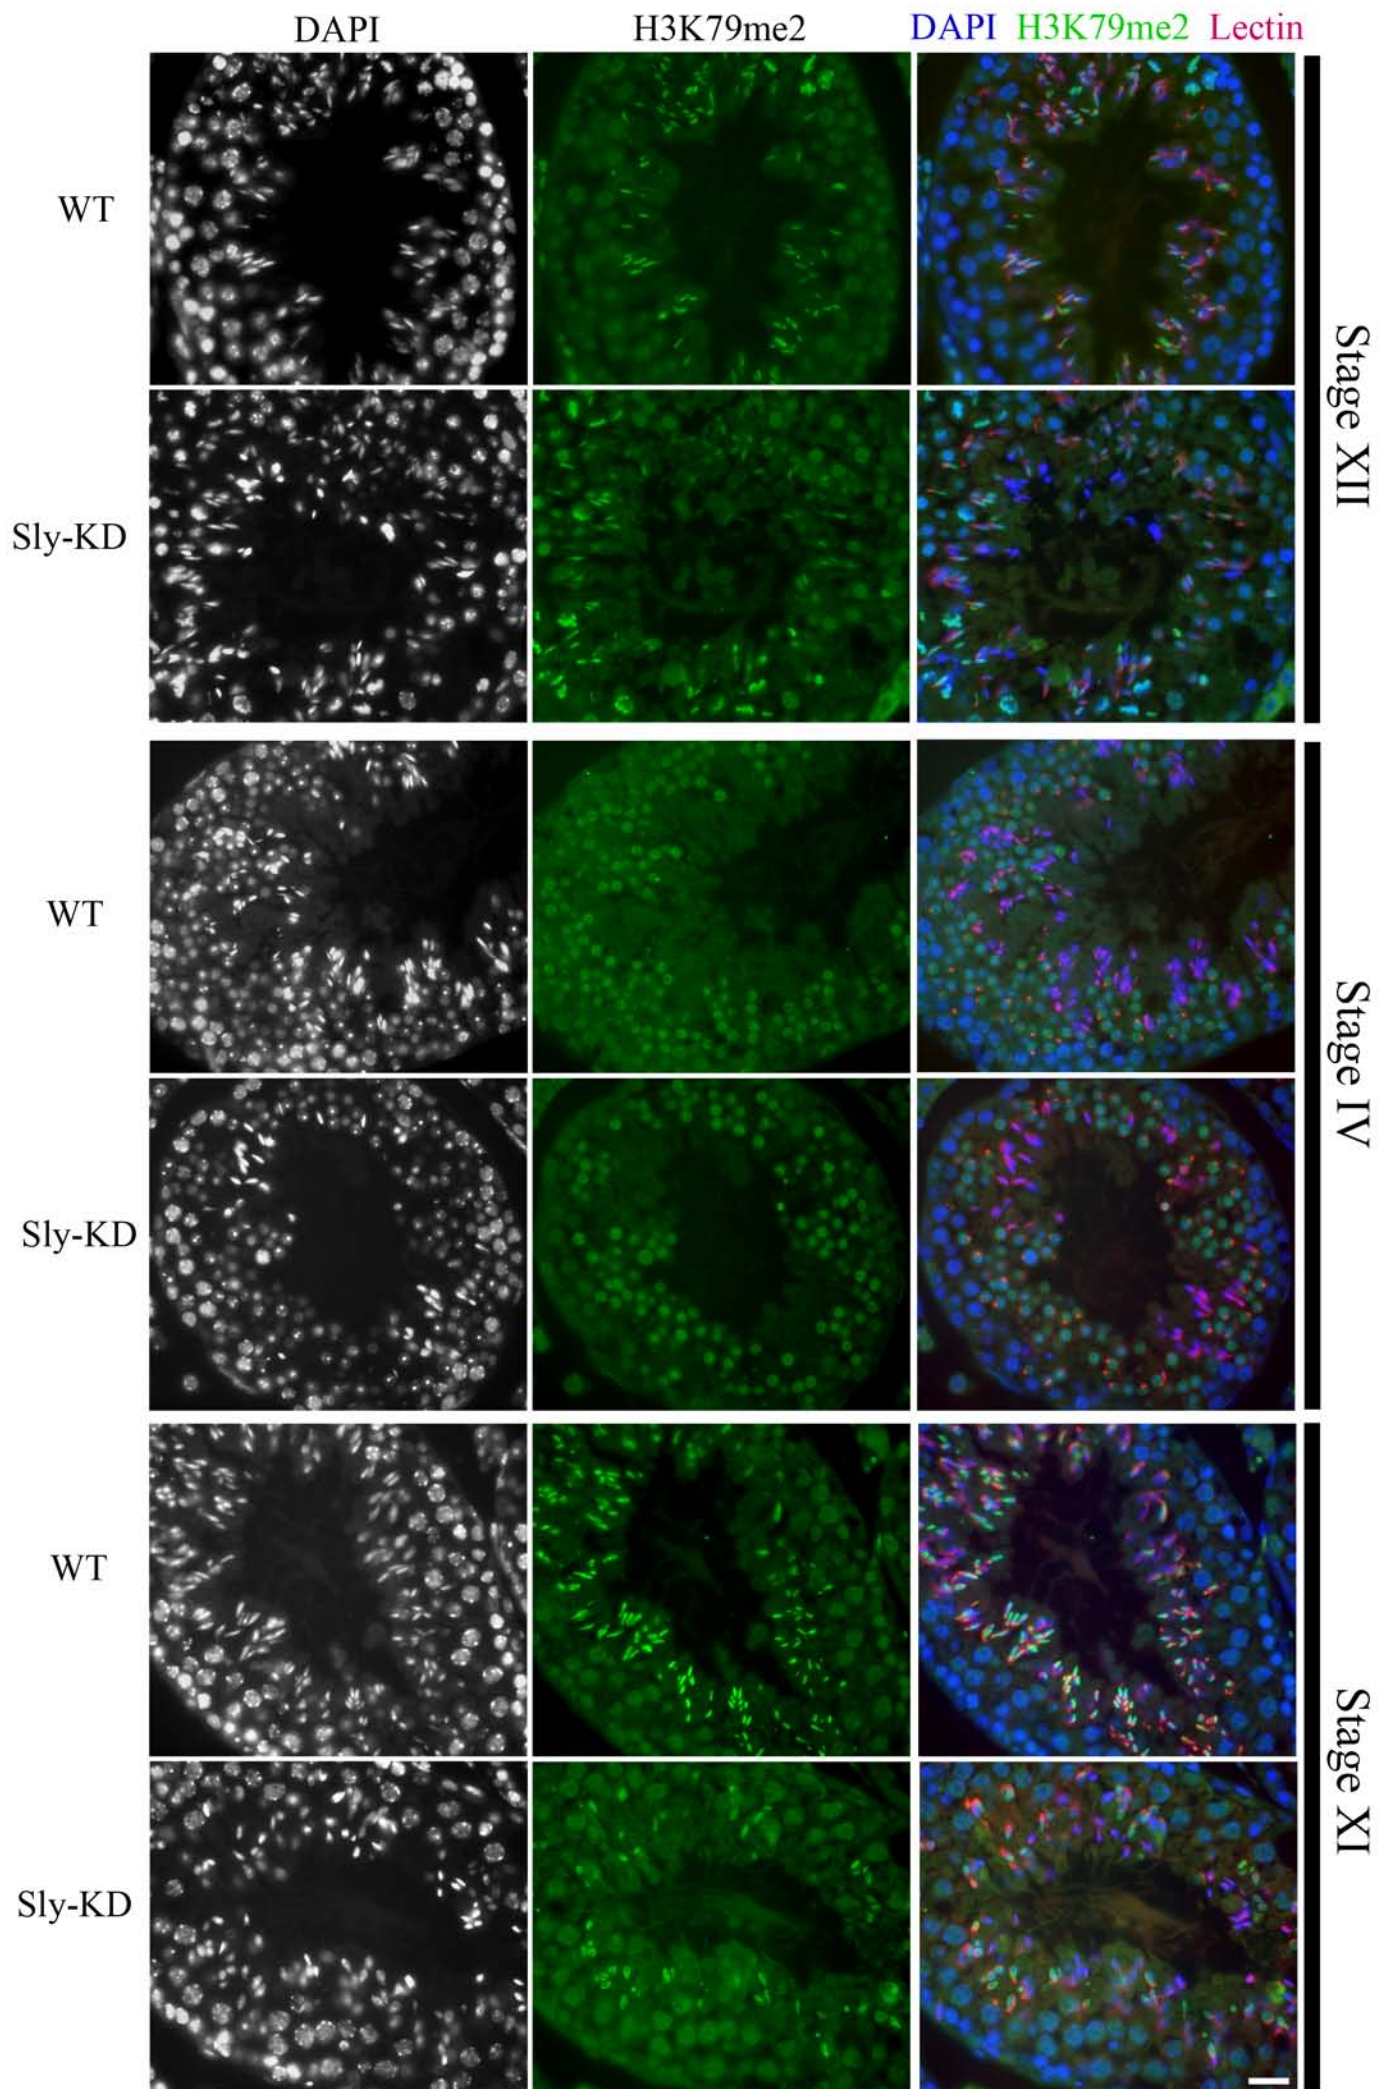



A

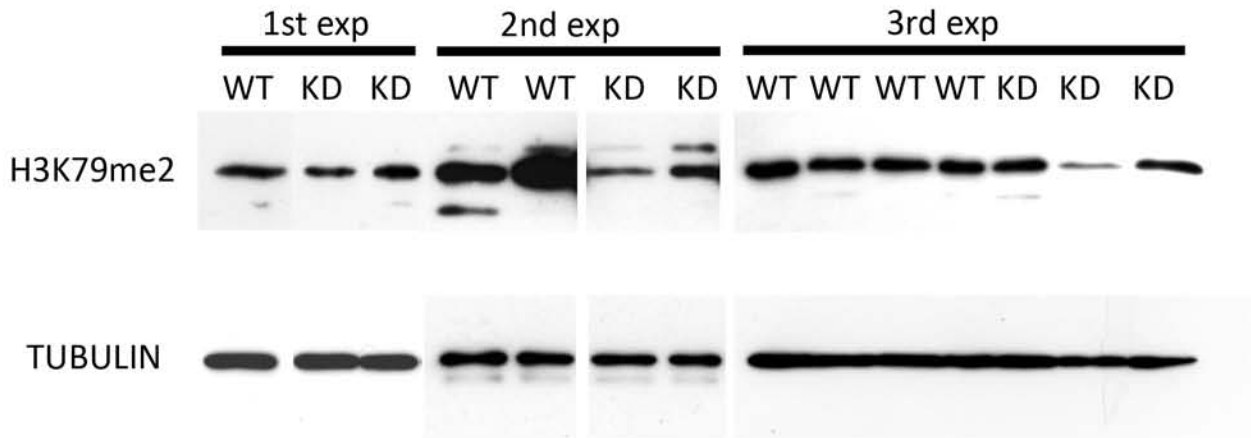

B

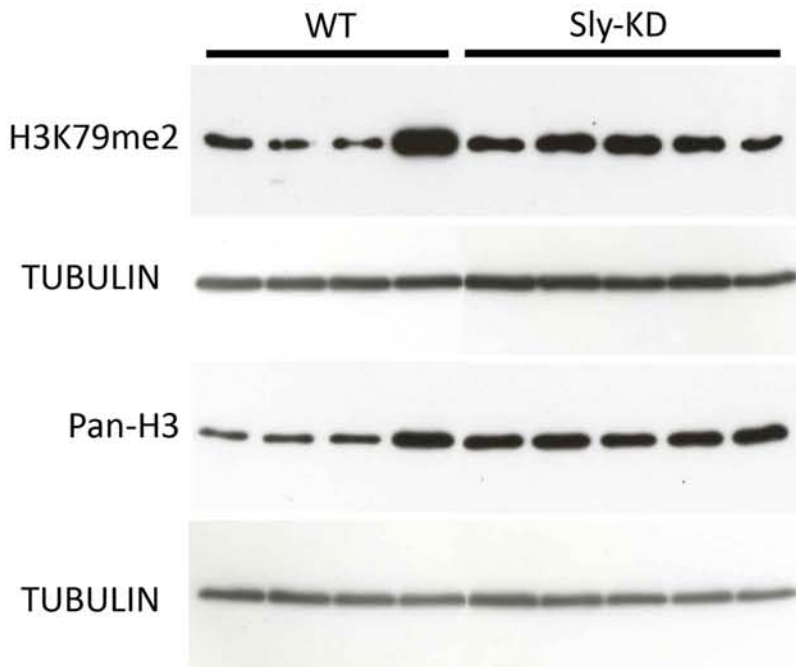

C

H3K79me2 in ES/CS spermatids

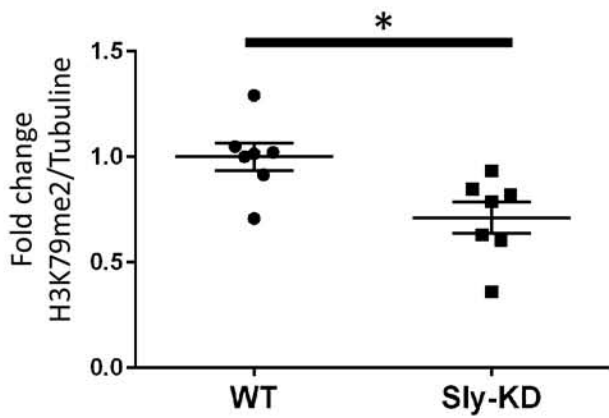

D

H3K79me2 level in spermatozoa

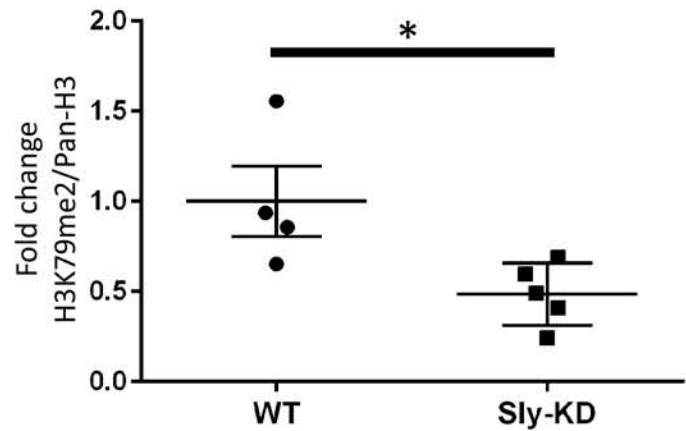

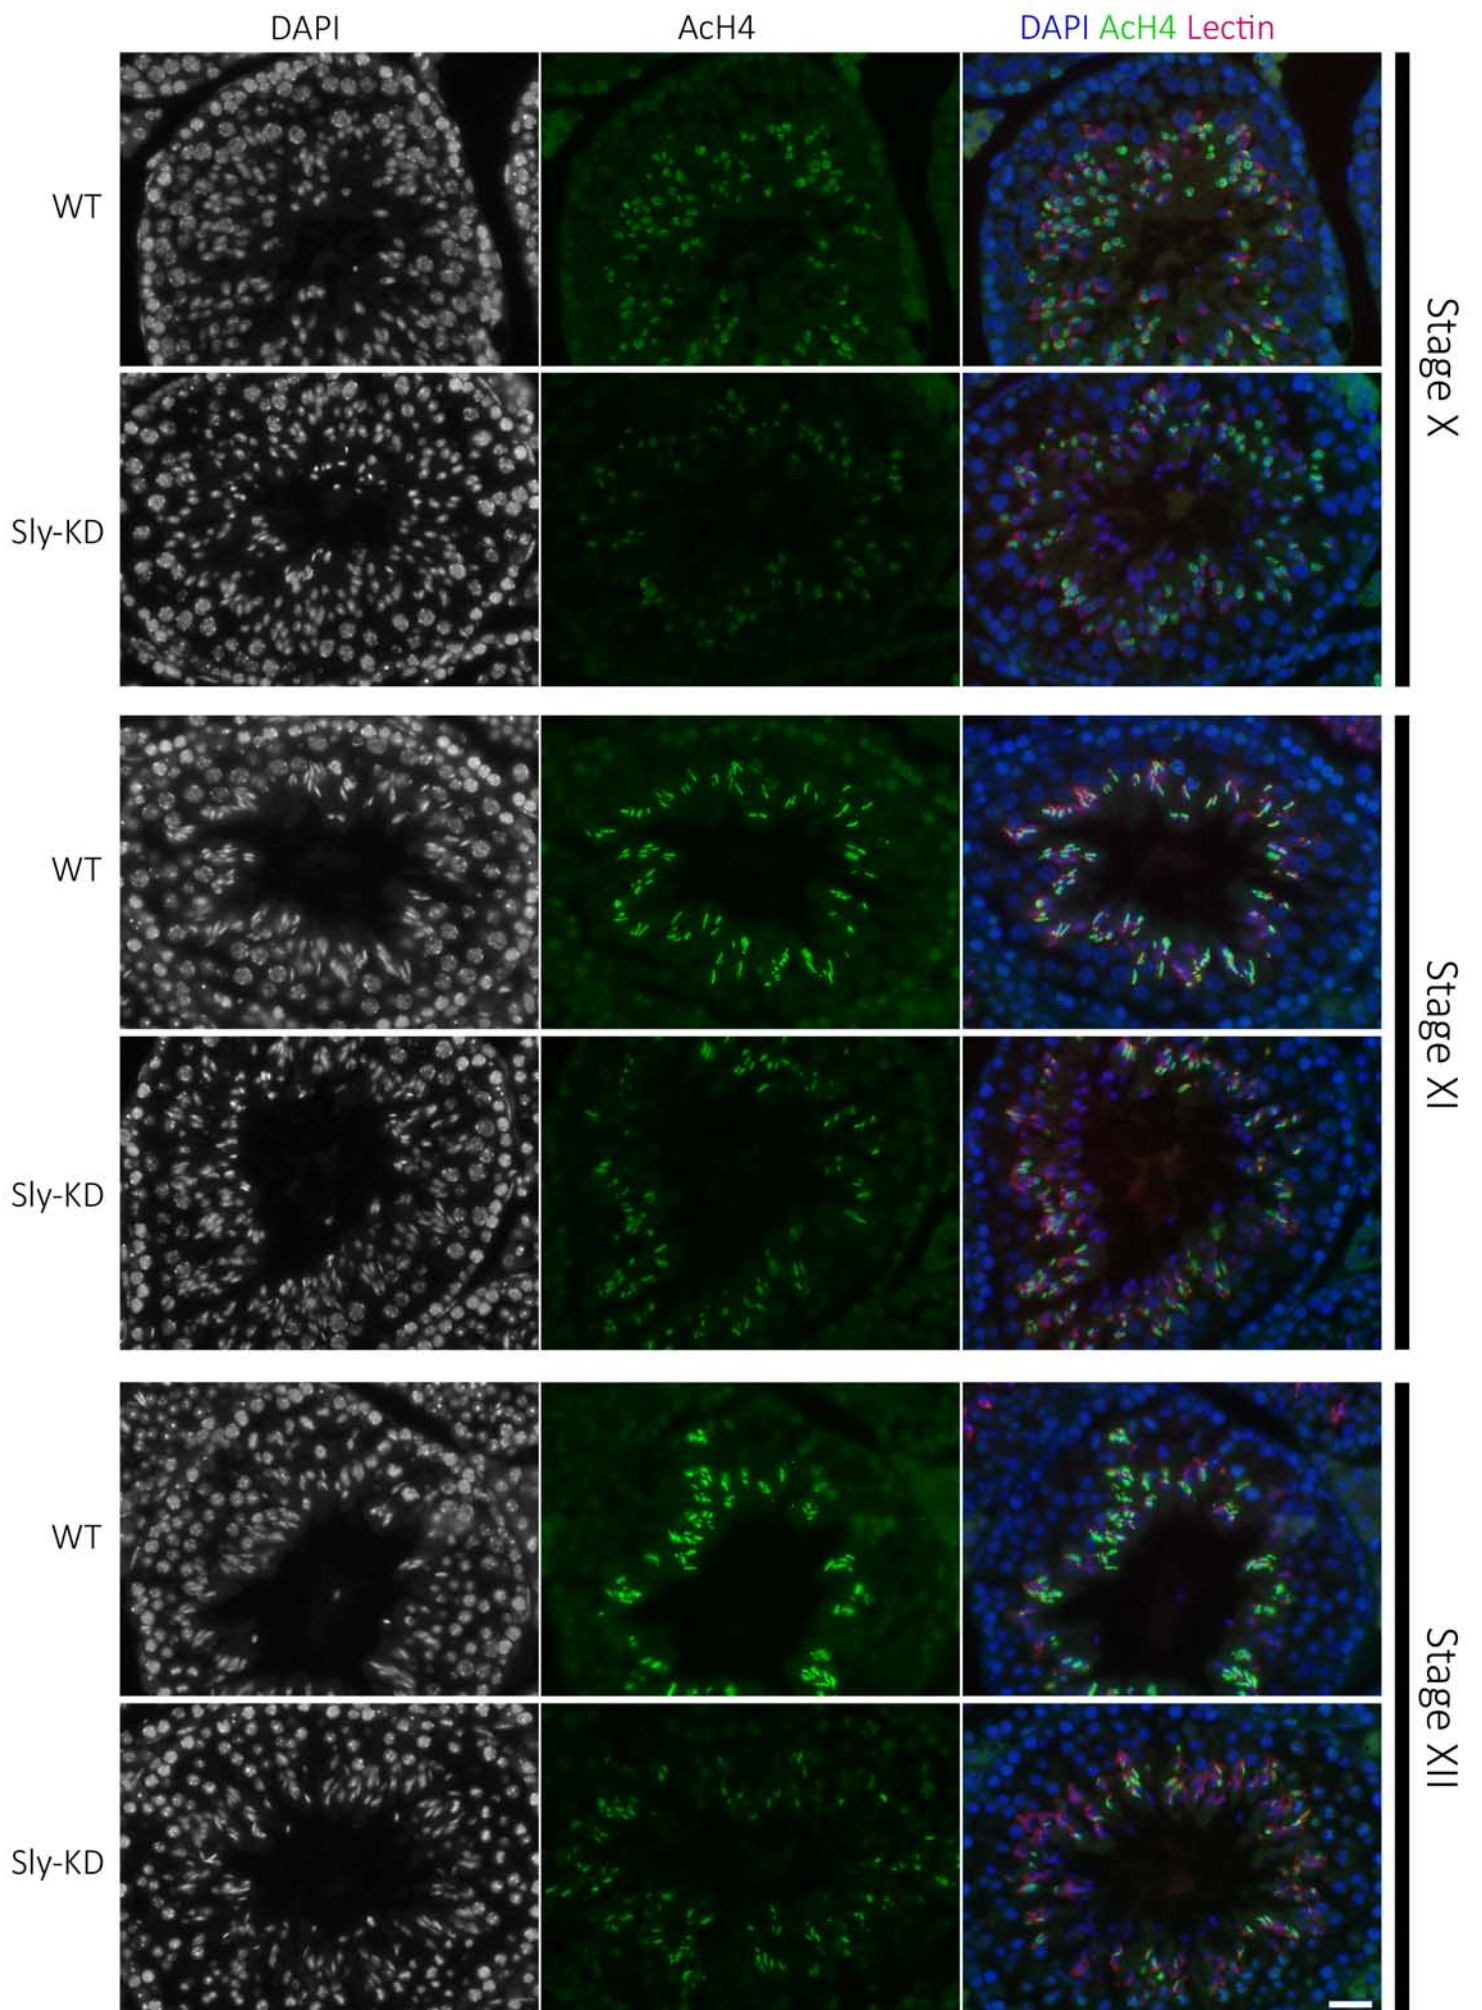

A

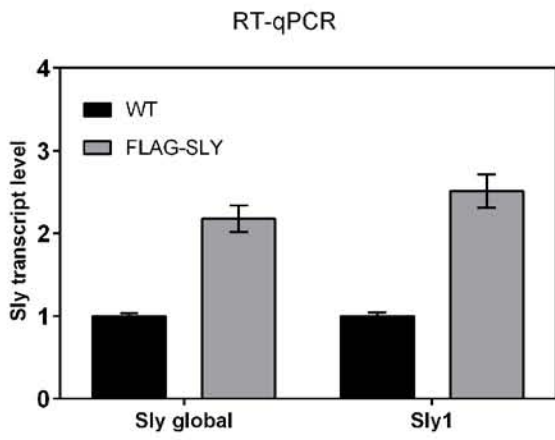

B

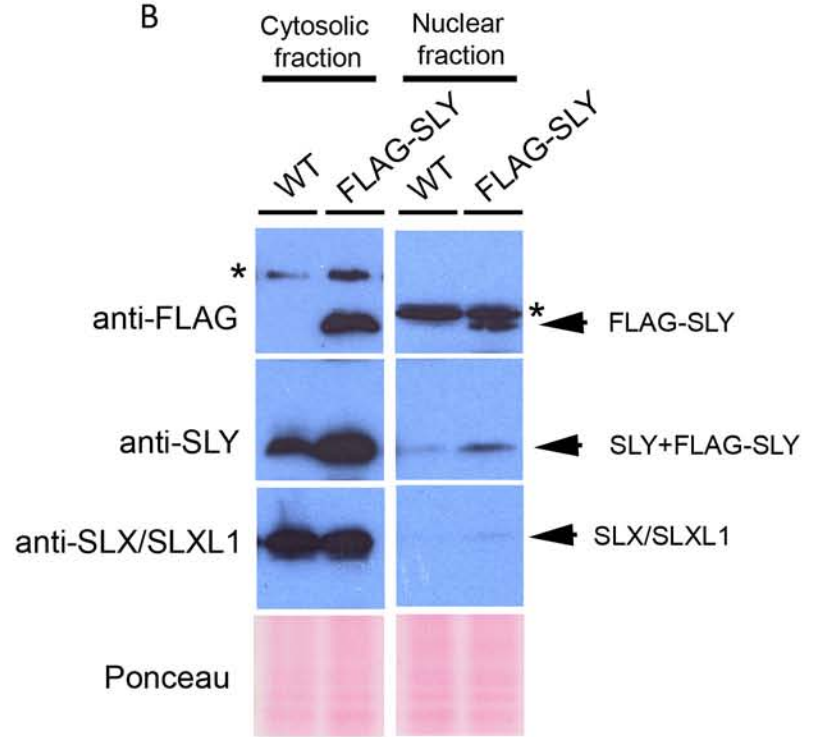

C

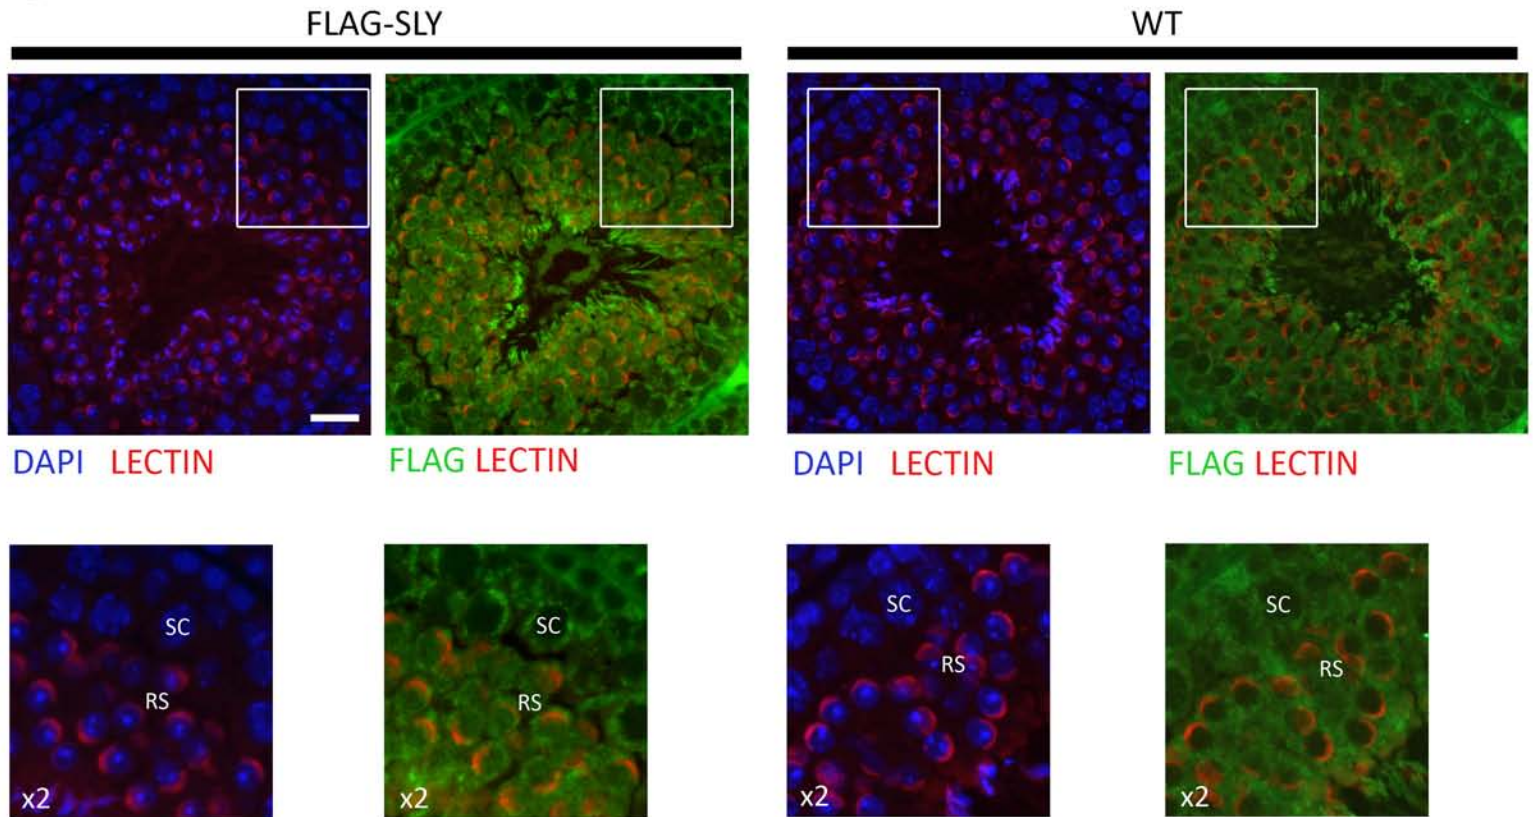

**Supplementary Figure 11.** List of primers designed for the study.

**Primers used for RTqPCR**

| Gene    | Primer sequence                               | Location | Annealing T°C |
|---------|-----------------------------------------------|----------|---------------|
| Gmcl1l  | GCAGACTACAGCAATGCCTC<br>ATCCCTGCAACTCAAGACCC  | gene     | 60°C          |
| Il2rg   | GTTGGTTGGAACGAATGCCT<br>CACTCCAGGCCGAAAAGTTC  | gene     | 60°C          |
| Dusp21  | TGGTGCCAGGAATCTAGTG<br>TGGGTAGCTTGAGACGGAAA   | gene     | 60°C          |
| Spin2d  | ACTATCTCTGGCAGCAGGAC<br>GATCTGCTCCTCTGCCTCTT  | gene     | 60°C          |
| Rp2h    | TGTGCCTAGCCTACCATCAG<br>ATTATACCTGCCCTGCCAGC  | gene     | 60°C          |
| Ube2a   | ACCGCGGACCCTGGTATATG<br>CCAAAAATGACCGCATTCCA  | gene     | 60°C          |
| Ube2b   | CGCCCCATCTGAAAACAACA<br>TGGGACTCCATCGATTCTGC  | gene     | 60°C          |
| Kdm2a   | CAGGTTGGATTTCATGCTGTG<br>GGATCGGTTGGTTATGCAGT | gene     | 60°C          |
| Yeats2  | TGTGGAAGTTAGAGAGCCCC<br>TCAGGAACAACGCTCTGCTAC | gene     | 60°C          |
| Ubb     | ACTCTGCACTCTAGCCACTT<br>GCTTACCATGCAACAAAACCT | gene     | 60°C          |
| Mettl23 | GCTGTAGTCTGGCCCAATA<br>GCAGCCAAAATCCCAGGAAG   | gene     | 60°C          |
| H2a3    | AGCCAACATCAACAACCAGC<br>GTCCAGGCATCTCGTCAAC   | gene     | 60°C          |

**Primers used for ChIPqPCR**

| Name         | Primer sequence                                | Location                          | Annealing T°C |
|--------------|------------------------------------------------|-----------------------------------|---------------|
| SlxChIP      | CATTCTTCTACGCCACTCC<br>CCTTAGGGTCCAACCTGTCCG   | TSS (420 bp downstream TSS)       | 55°C          |
| RbmxChIP     | ACAGGCCAAGGAAAGGAAAGT<br>TCCTTTGTTGCGCCTCGTTG  | TSS (42 bp downstream TSS)        | 55°C          |
| Rhox11ChIP   | GACCACTCTTGTGGTTTCCA<br>AAGTTCTACCCCGTGTGTGC   | TSS (flanking TSS)                | 55°C          |
| Ctag2ChIP    | CTTTCAAACAAAGGGCCCCA<br>ATCTCCCCCTGTGTGCTTTT   | TSS (42 bp upstream TSS)          | 55°C          |
| H2afb3ChIP   | CAGAGTGCGATGTCACAGGA<br>GTCCGGTACAAAGGGAGACA   | TSS (8 bp upstream TSS)           | 55°C          |
| Hist1h3aChIP | GAGGCTAAGGTAGTCTGCCG<br>CTGGCCTACTCCTTCAATGT   | TSS (118bp upstream TSS)          | 55°C          |
| Jmjd1cChIP   | ATCCCTGGAAAACGGCAGAT<br>ACTTCCCGTCCAATCACAACA  | TSS (850bp upstream TSS)          | 55°C          |
| Dot1lChIP    | GGGATTCTTGCCTTTTCGTG<br>CCCCTGACTTCTAGGGTCTT   | TSS (541 bp downstream TSS)       | 55°C          |
| NC           | TGGCATTGTGGGCTAGATTT<br>TGGAGATAAGATATGCGTCAAG | intragenic (170kb downstream TSS) | 55°C          |
| Ep300ChIP    | AAACTCTCATCTCCGGCCCT<br>AGCACCCCTGGAATGAAGGTG  | TSS (463 bp downstream TSS)       | 55°C          |
| Rdm1ChIP     | CAACCAAACCTTCTCGGCCTC<br>CCCCATACACTCAACACCGA  | TSS (flanking TSS)                | 55°C          |
| Prr13ChIP    | GCAACGGTTTCTCCTTGTG<br>TCAGTCTGGGTTGCACTTC     | TSS (35 bp downstream TSS)        | 55°C          |
